# Supplementary material
Source: publisher figshare collection journal article supplement (https://asha.figshare.com/ndownloader/files/30695726)
Supplement: Supplementary file 1 [file 30695726]

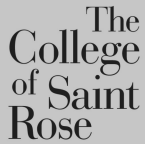

## Perceptions of Social Justice Among SLPs

**My name is Anthony Amitrano, a graduate student in the Communication Sciences and Disorders Department at The College of Saint Rose in Albany, NY. Due to your profession as a speech-language pathologist, you are invited to participate in this research study by completing the following survey. The research will focus on themes of social justice and how this may or may not relate to your practice within our dynamic field. Within the context of this survey, social justice is defined as recognition and active vigilance against inequalities that exist within our culture that have the potential to reduce opportunities for individuals perceived to be the least advantaged in our society to meet their full potential.**

**The above-described survey will require approximately 15 minutes of your time to complete. There is no compensation for responding, nor are there any known risks for participation. Identifying information, such as your name will not be collected, ensuring your anonymity. In order to ensure that all information will remain confidential, the data collected will only be observed by the investigators who have designed this study (Anthony Amitrano, Principal Investigator; Julia Unger, Ph.D., CCC-SLP, & David DeBonis, Ph.D., CCC-A, Co-Investigators) and will be used solely for the purposes of this study. If you choose to participate in this survey, please answer all questions as accurately as possible and to the best of your ability. There are no right or wrong answers to the questions provided. We are interested in your individual opinions and insights into your practice. Participation is strictly voluntary and you may discontinue or skip any questions you feel unable to answer.**

**Thank you for taking the time to actively advance the research base of our field. As other helping professions are starting to link social justice into their practices, it would be valuable for this to be studied in relation to our clinical work. The data collected will provide useful information regarding the role of social justice within the field of speech-language pathology, further identifying our involvement as practitioners. Selecting "Next" will indicate your willingness to participate in the research. If you require additional information or have questions, please feel free to contact the principal investigator at [Amitranoa707@strose.edu](mailto:Amitranoa707@strose.edu).**

**Sincerely,**

**Anthony R. Amitrano  
[Amitranoa707@strose.edu](mailto:Amitranoa707@strose.edu)**

1. In which geographic region is your primary residence? Please see below for visual reference.

- Midwest: Illinois, Michigan, Missouri, Ohio
- West: California, Colorado, Oregon, Washington
- New England: Connecticut, Maine, Massachusetts, New Hampshire
- Mid-Atlantic: Maryland, New Jersey, New York, Pennsylvania
- South: Florida, Georgia, North Carolina, Virginia
- Southwest: Arizona, New Mexico, Oklahoma, Texas

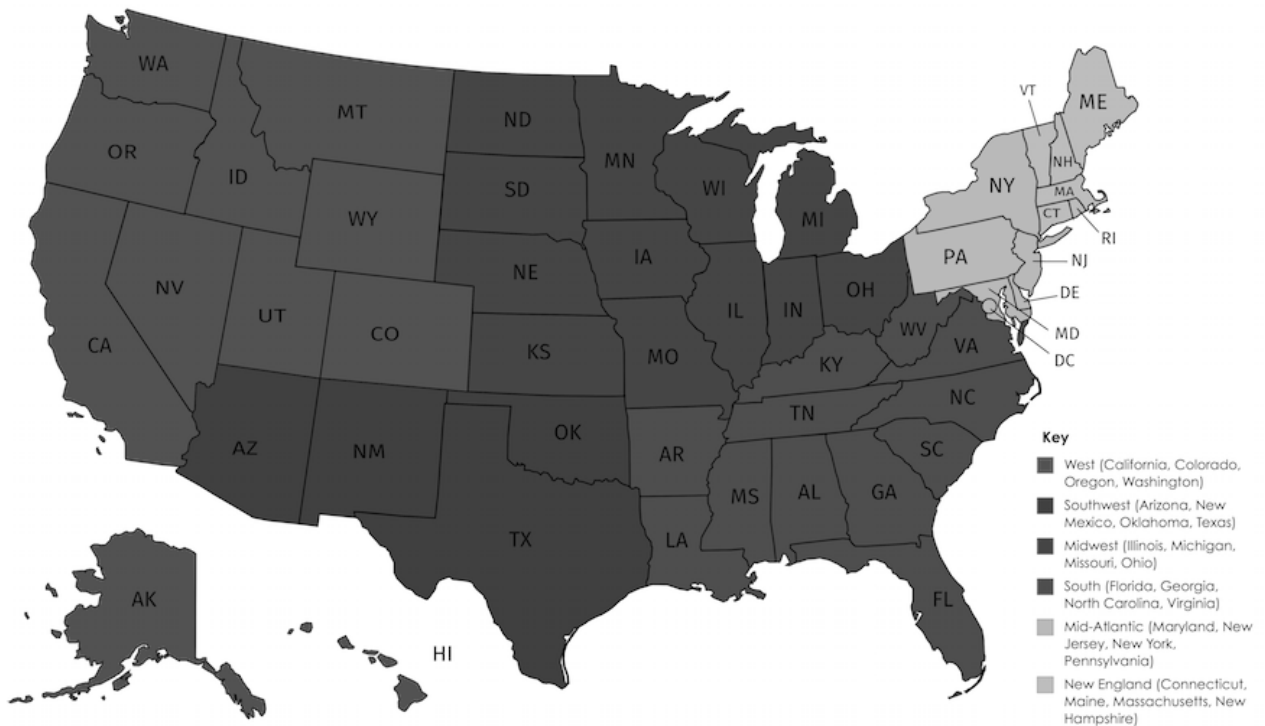

Created with mapchart.net ©

2. What is your highest degree earned?

- Bachelor's Degree
- Master's Degree
- Doctoral Degree

3. What is your current work setting? Please select all that apply.

- Early Intervention, Pre-K, K-12 Schools
- College or University
- Hospital
- Residential Health Care Facilities
- Nonresidential Health Care Facilities
- Private Practice
- Corporate Speech-Language Pathology
- Public Health Departments (Local, State, Federal Level)
- Uniformed Services
- Currently retired
- Currently unemployed

4. Which of the following are you currently providing in your clinical practice? Please select all that apply.

- Participation in insurance plans (including Medicaid)
- Participation in insurance plans (excluding Medicaid)
- Pro-bono work (work provided free for uninsured)
- Sliding scales (different amounts collected for services provided depending on income level)
- Group payment rates
- Payment plans for services
- Trial periods
- Financial assistance to client through fundraising
- Advocacy for client services to insurance companies
- Advocacy for client services at schools
- Advocacy for clients on the legislative level (e.g., e-mailing, calling, appointments with legislators on issues related to clients)
- Outreach to underserved populations (e.g., low socio-economic status, people of different national origins)
- Participation in tele-practice / tele-health services (services provided via telephone and/or video systems)
- Educational seminars to fellow professionals
- None of the above
- Other (please specify)

5. Which of the following would you be interested in providing for your clinical practice? Please select all that apply.

- Participation in insurance plans (including Medicaid)
- Participation in insurance plans (excluding Medicaid)
- Pro-bono work (work provided free for uninsured)
- Sliding scales (different amounts collected for services provided depending on income level)
- Group payment rates
- Payment plans for services
- Trial periods
- Financial assistance to client through fundraising
- Advocacy for client services to insurance companies
- Advocacy for client services at schools
- Advocacy for clients on the legislative level (e.g., e-mailing, calling, appointments with legislators on issues related to clients)
- Outreach to underserved populations (e.g., low socio-economic status, people of different national origins)
- Participation in tele-practice / tele-health services (services provided via telephone and/or video systems)
- Educational seminars to fellow professionals
- None of the above
- [Insert text from Other]
- Other (please specify)

6. In what professional organizations are you a member? Please select all that apply.

- International Association of Logopedics and Phoniatrics (IALP)
- American Speech, Language, and Hearing Association (ASHA)
- State Level Organization
- Regional/Local Level Organization

7. Does the professional organization you belong to have an advocacy page?

Yes

No

Unsure

8. Have you had any communication (e.g., verbal, written) with legislators regarding client advocacy?

Yes

No



9. What type of communication have you had with legislators? Please select all that apply.

- Phone calls
- E-mails
- Letters/Postcards
- In-person meetings
- Attendance at Town-Hall meetings
- Non-violent demonstrations
- Other (please specify)

10. Which of the following two sets of terms best describes how you view your primary role in working with your clients?

- Authority / Decision-maker / Teacher
- Collaborator / Coach / Consultant

11. Do you regularly incorporate counseling into your clinical practice?

Yes

No

12. To the best of your recollection, did the institution where you received your education require a counseling class?

Yes

No

13. Do you involve the client's immediate environment and significant communication partners in your clinical practice?

Yes

No

14. Which of the following have you done in your clinical practice? Please select all that apply.

- Free presentations to parents and/or caregivers
- Free presentations to other professionals
- Training of support staff to facilitate successful client interactions
- Training addressing issues of bullying and discrimination
- None of the above
- Other (please specify)

15. In your clinical practice, has a referral network been established (e.g., psychologist, mental health counselor, physician) to promote transdisciplinary care?

Yes

No

16. In your clinical practice, which of the following referral sources have been established to promote transdisciplinary care? Please select all that apply.

- Audiologists
- Social Worker
- Psychologist
- Psychiatrists
- Mental Health Counselor
- Occupational Therapist
- Physical Therapist
- Teachers
- School Administrator
- Physician
- Neurologist
- Other (please specify)



17. Does the workplace have a mission statement / philosophy of patient care?

Yes

No

Unsure

18. In your opinion, how effectively does your workplace implement it's mission statement/philosophy of patient care in daily practice?

Never Sometimes Always

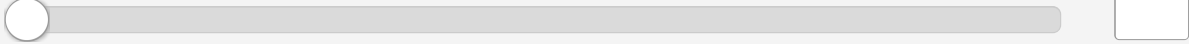

19. In your opinion, how well do you implement the mission statement/philosophy of patient care in your daily practice as a clinician?

Never Sometimes Always

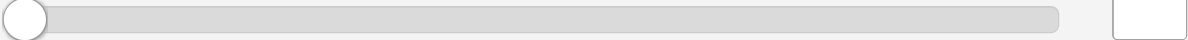

20. For which of the following has your workplace made a concerted effort to reach out and provide speech and language services to people from diverse populations belonging to the following groups? Please select all that apply.

- People with disabilities
- People of different racial categories
- People of different ethnicities
- Military/Veteran Personnel
- People of different national origin
- People of different sexual orientations
- People of different gender identities and expressions
- People of different political affiliations
- People of different religions
- People of low socio-economic status
- None
- Unsure
- Other (please specify)

21. Using the following scale, how important is an understanding of social justice in your clinical practice?

Not at all

Minimally

Neutral

Somewhat

Very

22. Using the following scale, how important is it to put forth efforts to create equality among the populations you service in your clinical practice?

|                       |                       |                       |                       |                       |
|-----------------------|-----------------------|-----------------------|-----------------------|-----------------------|
| Not at all            | Minimally             | Neutral               | Somewhat              | Very                  |
| <input type="radio"/> |

23. Using the following scales provided, which are the largest barriers to incorporating social justice into your clinical practice?

|                                | Not at all            | Minimally             | Neutral               | Somewhat              | Very                  |
|--------------------------------|-----------------------|-----------------------|-----------------------|-----------------------|-----------------------|
| Lack of time                   | <input type="radio"/> |
| Lack of awareness              | <input type="radio"/> |
| Lack of resources              | <input type="radio"/> |
| Lack of importance             | <input type="radio"/> |
| Lack of administrative support | <input type="radio"/> |
| Lack of finances               | <input type="radio"/> |
